# Supplementary material
Source: publisher site journal article supplement (https://www.dovepress.com/article/602760)
Supplement: Supplementary file 1 [file 602760%20Supplementary%20Table%20S1.docx]

**Supplementary Table S1: Hyperparameter tuning details**

| Model | Hyperparameter | Search Range |
| --- | --- | --- |
| SVM | cost | c (-5, 5) |
|  | rbf_sigma | c (-4, -1) |
| RF | mtry | c (2, 10) |
|  | trees | c (200, 500) |
|  | min_n | c (20, 50) |
| KNN | neighbors | c (3, 11) |
| DT | tree_depth | c (3, 7) |
|  | min_n | c (5, 10) |
|  | cost_complexity | c (-6, -1) |
| XGBoost | mtry | c (2, 8) |
|  | min_n | c (5, 20) |
|  | tree_depth | c (1, 3) |
|  | learn_rate | c (-3, -1) |
|  | loss_reduction | c (-3, 0) |
|  | sample_prop | c (0.8, 1) |
| LR | lambda | c (0, 1) |

SVM, support vector machine; RF, random forest; KNN, k-nearest neighbor; DT, decision tree; XGBoost, extreme gradient boosting; LR, logistic regression
